# Supplementary material
Source: PubMed Central journal article supplement (PMC5499365)
Supplement: jciinsight-2-90036-s001.pdf [file jciinsight-2-90036-s001.pdf]

## Supplemental Information

### **Osteogenic Differentiation in Bone Marrow Mesenchymal Stromal Cells Confers a Proliferative Advantage to Resident Leukemia Cells**

V. Lokesh Battula<sup>1\*</sup>, Phuong M. Le<sup>1</sup>, Jeffrey C. Sun<sup>1</sup>, Khoa Nguyen<sup>1</sup>, Bin Yuan<sup>1</sup>, Ximin Zhou<sup>1</sup>, Sonali Sonnylal<sup>1</sup>, Teresa McQueen<sup>1</sup>, Vivian Ruvolo<sup>1</sup>, Keith A. Michel<sup>2</sup>, Xiaoyang Ling<sup>1</sup>, Rodrigo Jacamo<sup>1</sup>, Elizabeth Shpall<sup>3</sup>, Zhigiang Wang<sup>4</sup>, Arvind R Uppore Kukkillaya<sup>5</sup>, Gheath Al-Altrash<sup>3</sup>, Marina Konopleva<sup>1</sup>, R. Eric Davis<sup>4</sup>, Melvyn A. Harrington<sup>6</sup>, Catherine W. Palisch<sup>6</sup>, Carlos Bueso-Ramos<sup>7</sup>, Michael Andreeff<sup>1,2\*</sup>

<sup>1</sup>Molecular Hematology and Therapy, Department of Leukemia, <sup>2</sup>Small Animal Imaging Facility (SAIF), <sup>3</sup>Department of Stem Cell Transplantation and Cellular Therapy, <sup>4</sup>Department of Lymphoma and Myeloma, <sup>5</sup>Department of Bioinformatics and Computational Biology, University of Texas MD Anderson Cancer Center, Houston, TX. <sup>6</sup>Orthopedic Surgery, Baylor College of Medicine, Houston, TX. <sup>7</sup>Department of Hematopathology, University of Texas MD Anderson Cancer Center, Houston, TX.

|    | <b>TNAP<br/>MFI</b> | <b>Age</b> | <b>Disease<br/>status</b> | <b>Gender</b> | <b>Blast%</b> | <b>WBC<br/>K/<math>\mu</math>l</b> | <b>Type of AML (WHO)</b>                   |
|----|---------------------|------------|---------------------------|---------------|---------------|------------------------------------|--------------------------------------------|
| 1  | 14222               | 58         | Relapsed                  | Female        | 71%           | 6.8                                | Therapy related-M2                         |
| 2  | 836                 | 67         | Remission                 | Male          | 1%            | 0.7                                | AML with myelodysplasia                    |
| 3  | 526                 | 63         | Remission                 | Male          | 1%            | 1.7                                | AML                                        |
| 4  | 3277                | 55         | Relapsed                  | Male          | 20%           | 0.8                                | AML                                        |
| 5  | 7018                | 53         | Relapsed                  | Male          | 91%           | 44.5                               | AML with Multi-lineage displacia-<br>M4    |
| 6  | 6982                | 60         | Remission                 | Female        | 32%           | 50                                 | AML with Myelomonocytic<br>Differentiation |
| 7  | 2740                | 25         | Relapsed                  | Female        | 72%           | 63.4                               | AML                                        |
| 8  | 511.6               | 69         | Relapsed                  | Male          | 66%           | 58.5                               | Relapsed-refractory AML                    |
| 9  | 952                 | 47         | Relapsed                  | Male          | 55%           | 12.5                               | AML with minimal differentiation           |
| 10 | 360                 | 46         | Relapsed                  | Male          | 65%           | 1.1                                | AML with maturation-M2                     |
| 11 | 16927               | 33         | Relapsed                  | Male          | 49%           | 17.4                               | AML with maturation-M2                     |
| 12 | 672                 | 44         | Remission                 | Male          | 86%           | 55.1                               | AML with Inv(16)                           |
| 13 | 13359               | 58         | Relapsed                  | Female        | 40%           | 3.2                                | AML with maturation-M2                     |
| 14 | 1068.1              | 56         | Remission                 | Female        | 6%            | 0.1                                | Therapy related-M2                         |
| 15 | 576.9               | 43         | Relapsed                  | Female        | 88%           | 21.3                               | Therapy related-M2                         |
| 16 | 3914                | 59         | Relapsed                  | Female        | 83%           | 9.4                                | AML with myelodysplasia                    |
| 17 | 998                 | 46         | Remission                 | Male          | 12%           | 1.8                                | AML with maturation-M2                     |
| 18 | 7608                | 62         | New                       | Male          | 52%           | 39.4                               | AML with myelodysplasia                    |
| 19 | 415.67              | 70         | Relapsed                  | Male          | 59%           | 1.6                                | AML with myelodysplasia                    |
| 20 | 17836               | 78         | New                       | Male          | 77%           | 1.5                                | AML-M2                                     |
| 21 | 2675                | 63         | New                       | Female        | 70%           | 11.3                               | AML-M0                                     |
| 22 | 16848               | 69         | New                       | Male          | 32%           | 26.2                               | AML-M4-FAB                                 |
| 23 | 1508                | 55         | New                       | Female        | 92%           | 92.3                               | Therapy related-M2                         |
| 24 | 2186                | 68         | New                       | Male          | 68%           | 15.9                               | AML                                        |
| 25 | 1784.5              | 61         | Remission                 | Female        | 2%            | 3.8                                | AML-M4-FAB                                 |
| 26 | 451.5               | 62         | Relapsed                  | Male          | 73%           | 0.7                                | AML with myelodysplasia                    |
| 27 | 575.5               | 63         | Relapsed                  | Male          | 67%           | 2                                  | AML                                        |
| 28 | 1003                | 70         | Relapsed                  | Male          | 22%           | 38.5                               | AML-FAB M5b                                |
| 29 | 1786.5              | 70         | Remission                 | Male          | 0%            | 3.6                                | AML-M0                                     |
| 30 | 176.1               | 63         | Normal-<br>BM             | Female        | NA            | NA                                 | Normal-BM-Donor                            |
| 31 | 216.8               | 53         | Normal-<br>BM             | Male          | NA            | NA                                 | Normal-BM-Donor                            |
| 32 | 147.8               | 62         | Normal-<br>BM             | Female        | NA            | NA                                 | Normal-BM-Donor                            |
| 33 | 110.6               | 48         | Normal-<br>BM             | Female        | NA            | NA                                 | Normal-BM-Donor                            |

|    |       |    |           |        |    |    |                 |
|----|-------|----|-----------|--------|----|----|-----------------|
| 34 | 369.9 | 50 | Normal-BM | Male   | NA | NA | Normal-BM-Donor |
| 35 | 75.2  | 43 | Normal-BM | Male   | NA | NA | Normal-BM-Donor |
| 36 | 144.4 | 60 | Normal-BM | Male   | NA | NA | Normal-BM-Donor |
| 37 | 247.3 | 59 | Normal-BM | Female | NA | NA | Normal-BM-Donor |
| 38 | 62.8  | 58 | Normal-BM | Female | NA | NA | Normal-BM-Donor |
| 39 | 154   | 49 | Normal-BM | Female | NA | NA | Normal-BM-Donor |
| 40 | 83    | 57 | Normal-BM | Female | NA | NA | Normal-BM-Donor |

**Supplementary Table 1.** Characteristics of AML patient bone marrow donors. MSCs were isolated from BM samples from AML patients (sample 1-24) or normal donors (Samples 25-35) and subjected to flow cytometry for TNAP quantification. For each patient, TNAP mean fluorescence intensity (MFI), age, gender and percentage of blasts in the BM are listed. A gradient from blue to red was used to indicate the expression of TNAP in AML- and Normal-MSCs; dark blue being the lowest expresser and dark red being higher expresser. n/a signifies that information not available.

| Function                   | Gene               | Forward (5'-3')            | Reverse (5'-3')            |
|----------------------------|--------------------|----------------------------|----------------------------|
| Osteoblast Differentiation | RUNX2              | ATGTGTGTTTGTTCAGCAGCA      | TCCTAAAGTCACTCGGTATGTGTA   |
|                            | Osterix            | TAGTGGTTTGGGGTTTGTTCACC GC | AACCAACTCACTCTTATCCCTAAGT  |
|                            | Osteopontin (OPN)  | TTGCAGCCTTCTCAGCCAA        | GGAGGCAAAGCAAATCACTG       |
|                            | TNAP               | CCTCCTCGGAAGACACTCTG       | GCAGTGAAGGGCTTCTTGTC       |
| Adipocyte Differentiation  | aP2                | AACCTTAGATGGGGGTGTC        | GTGGAAGTGACGCCTTTCAT       |
|                            | PPAR-gamma         | GCTGGCCTCCTTGATGAATA       | TTGGGCTCCATAAAGTCACC       |
|                            | Lipoprotein lipase | GGGCATGTTGACATTTACCC       | GCTGGTCCACATCTCCAAGT       |
| Others                     | CTGF               | GCA GGC TAG AGA AGC AGAGC  | TGG AGA TTT TGG GAG TAC GG |
|                            | Beta-actin         | CTGGAACGGTGAAGGTGACG       | AGTCCTCGCCACATTGTGA        |
|                            | GAPDH              | GAGTCA ACG GAT TTG GTC GT  | TTGATT TTG GAG GGA TCT CG  |

**Supplementary Table 2.** PCR primer sequences Sybr-green qRT-PCR. Primer sequences for genes involved in osteogenic and adipogenic genes and other genes involved in the study are listed.

| <b>Gene name</b>      | <b>Taqman assay ID</b> |
|-----------------------|------------------------|
| BMP1                  | hs00241807_m1          |
| BMP2                  | Hs00154192_m1          |
| BMP4                  | Hs03676628_s1          |
| BMP6                  | Hs01099594_m1          |
| BMP7                  | Hs00233476_m1          |
| BMP10                 | Hs00205566_m1          |
| COL1A1                | Hs00164004_m1          |
| Bone Sialoprotein     | Hs00173720_m1          |
| Osteopontin           | Hs00959010_m1          |
| RUNX2                 | Hs01047973_m1          |
| Osterix               | Hs01866874_s1          |
| Beta-2- microglobulin | Hs00187842_m1          |

**Supplementary Table 3.** List of Taqman gene expression assays used for qRT-PCR.

A)

N-MSC

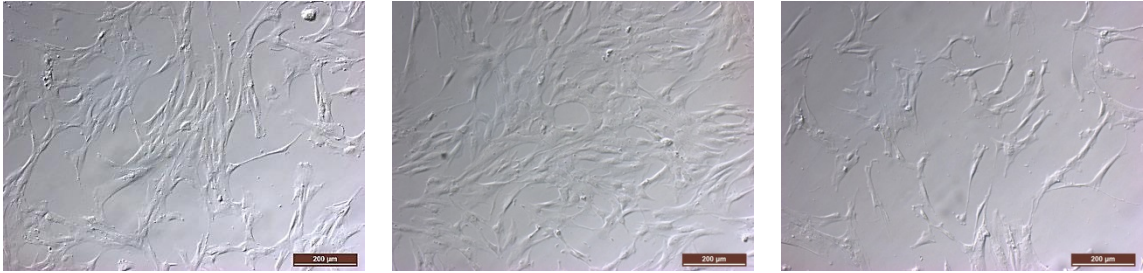

AML-MSC

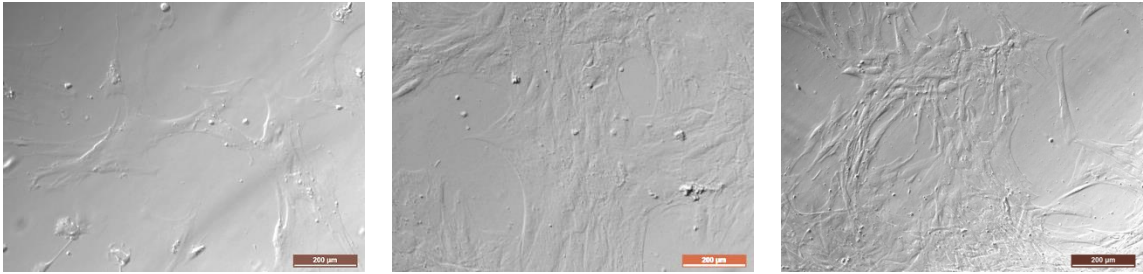

B)

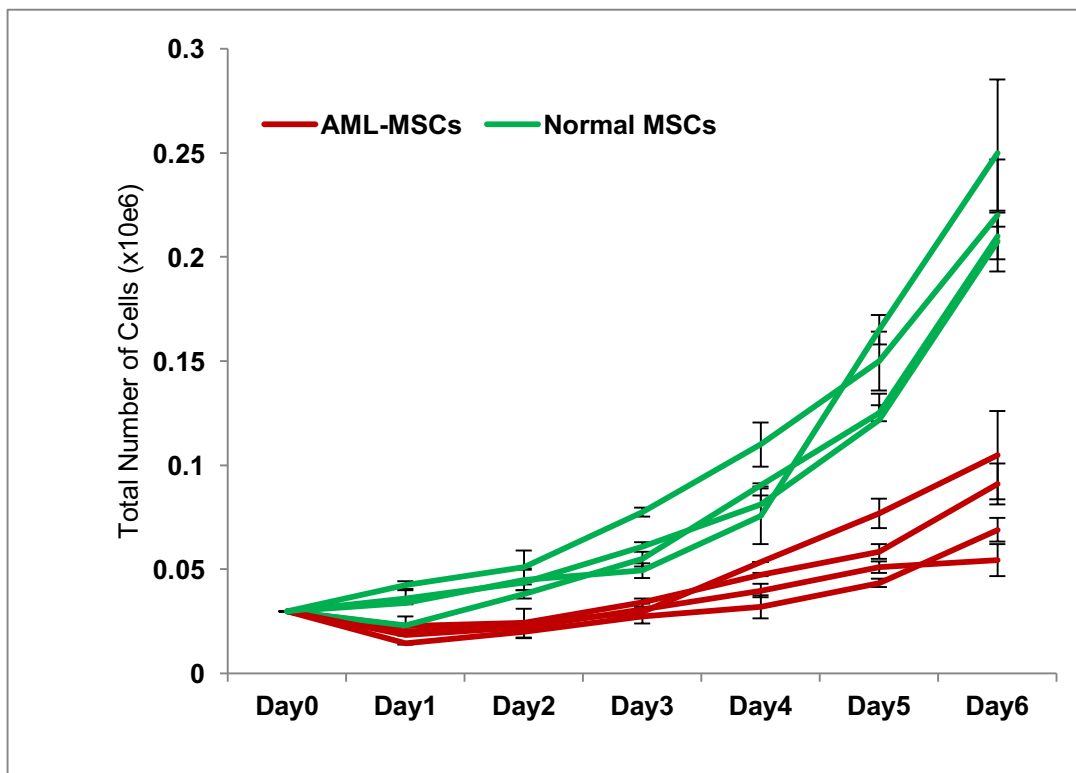

**Supplementary Figure 1.** AML mesenchymal stem/stromal cells (MSCs) proliferate more slowly than normal MSCs (N-MSCs). (a) Morphology of representative N-MSCs and AML-MSCs (n=4). Images were taken at passage 2-3. Scale bar, 200  $\mu\text{m}$ . (b) Growth curves of N-MSCs and

AML-MSCs were obtained by counting absolute cell numbers with a trypan blue-based live cell counter daily for 7 days.

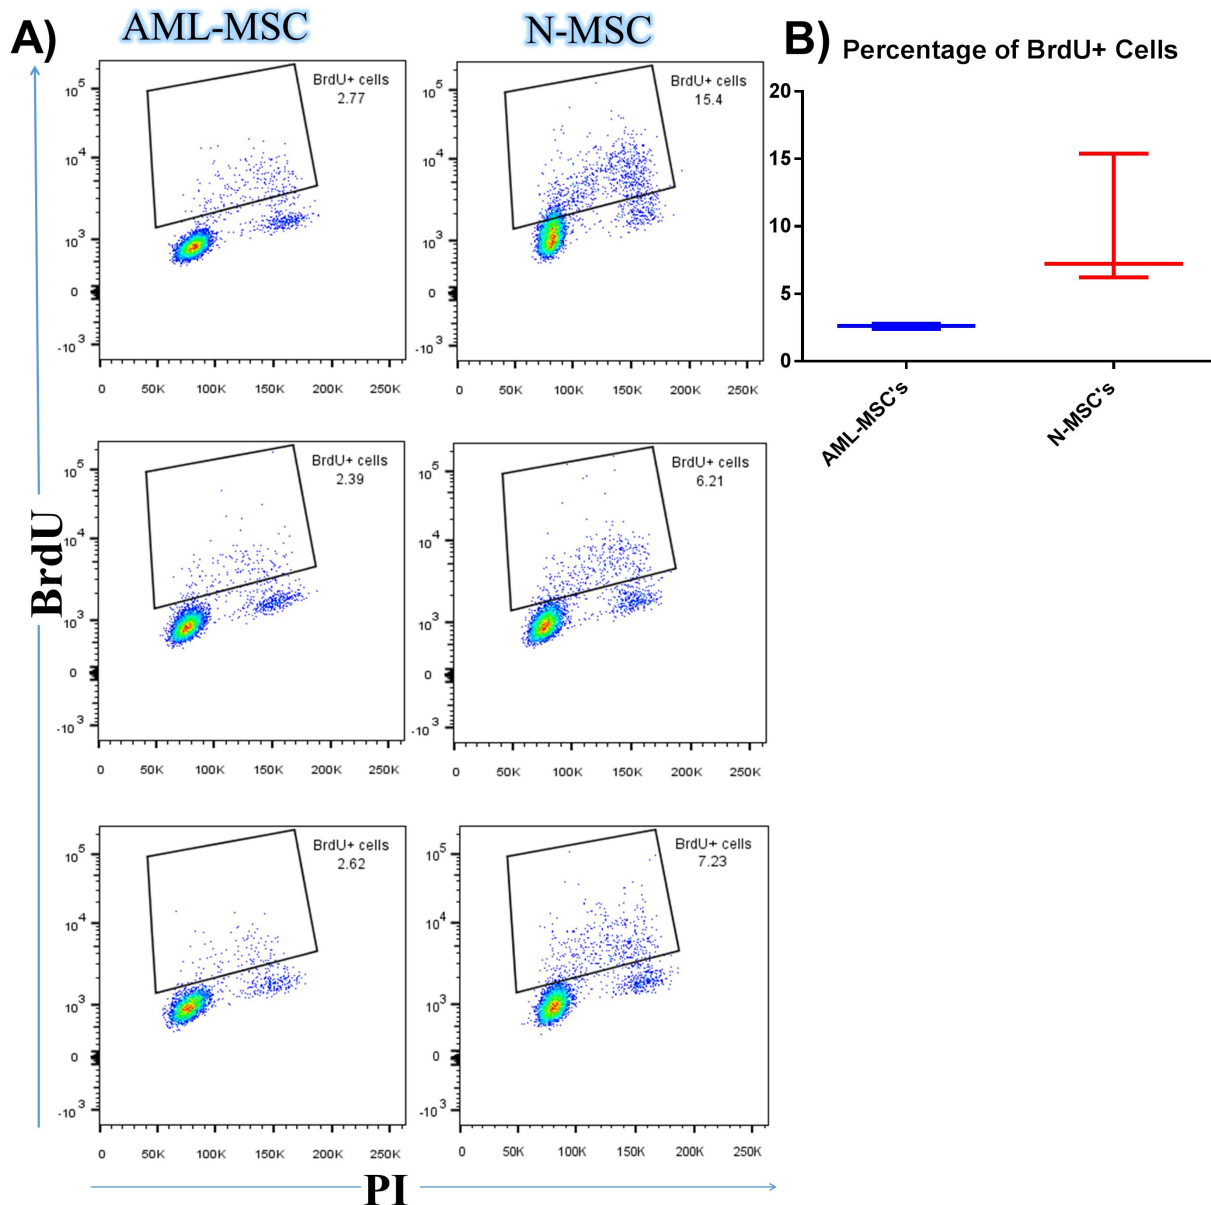

**Supplementary Figure 2.** *AML-MSCs proliferate more slowly than N-MSCs.* Cell cycle progression of N-MSCs and AML-MSCs was analyzed by BrdU pulse/propidium iodide (PI) staining (n=5 per group). (a) Representative flow cytometric plots and (b) quantification of N- and AML-MSCs in S/G2 phase. Data were analyzed by FlowJo software ( $p < 0.03$ ).

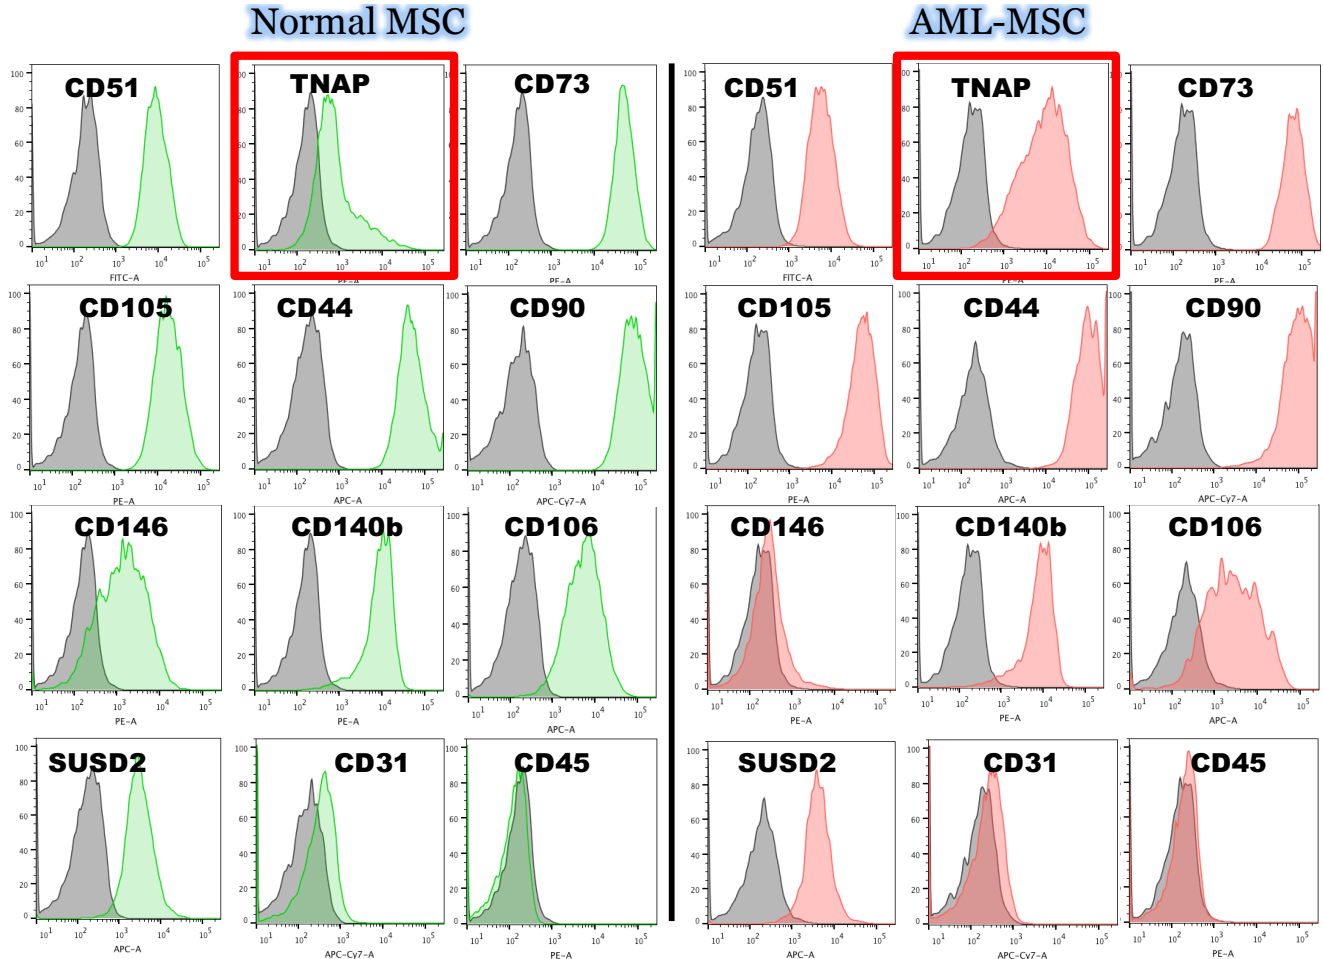

**Supplementary Figure 3.** *AML-MSCs express higher levels of tissue-nonspecific alkaline phosphatase (TNAP) Compared to Normal-MSCs* . N-MSCs and AML-MSCs were immunophenotyped for indicated cell surface markers by flow cytometry. Data were analyzed by FlowJo software. Differential expression of TNAP in N- and AML-MSCs is highlighted by the red boxes.

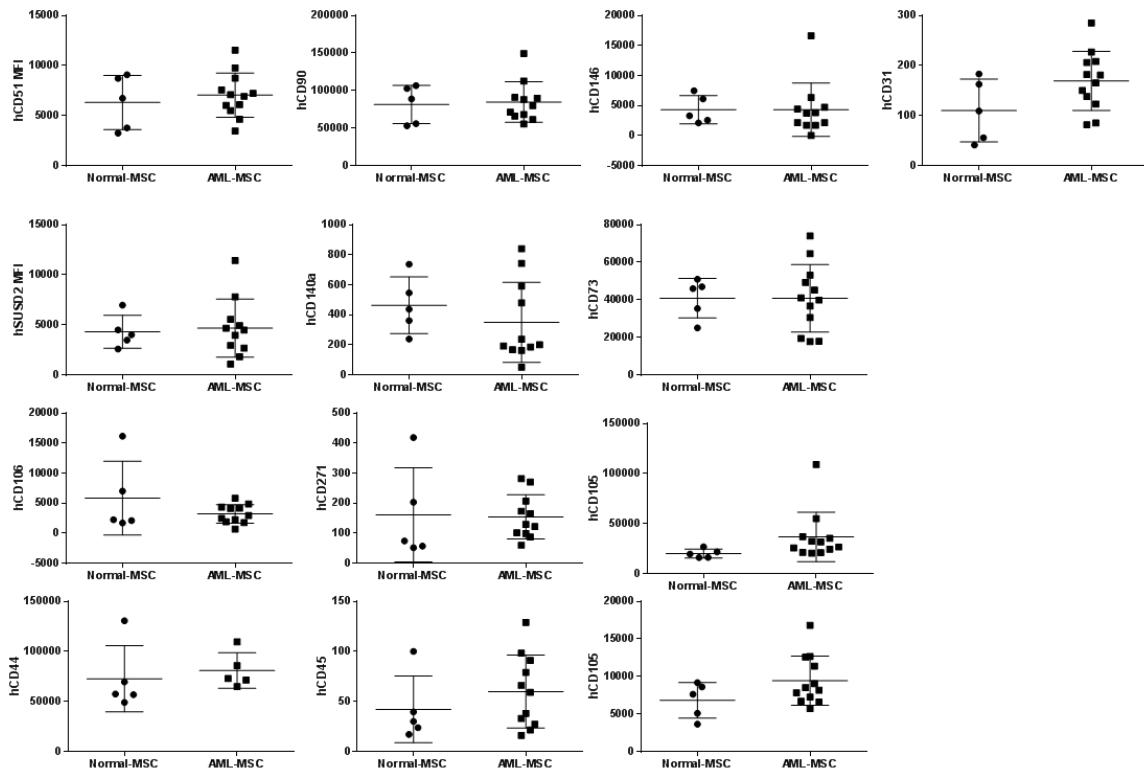

**Supplementary Figure 4.** *Cell surface expression of MSC associated markers in AML- and Normal-MSCs .* N-MSCs and AML-MSCs were immunophenotyped for indicated cell surface markers by flow cytometry. Mean fluorescence intensity (MFI) for each marker was generated by analyzing the data on FlowJo software. Graphs were generated using Prism software.



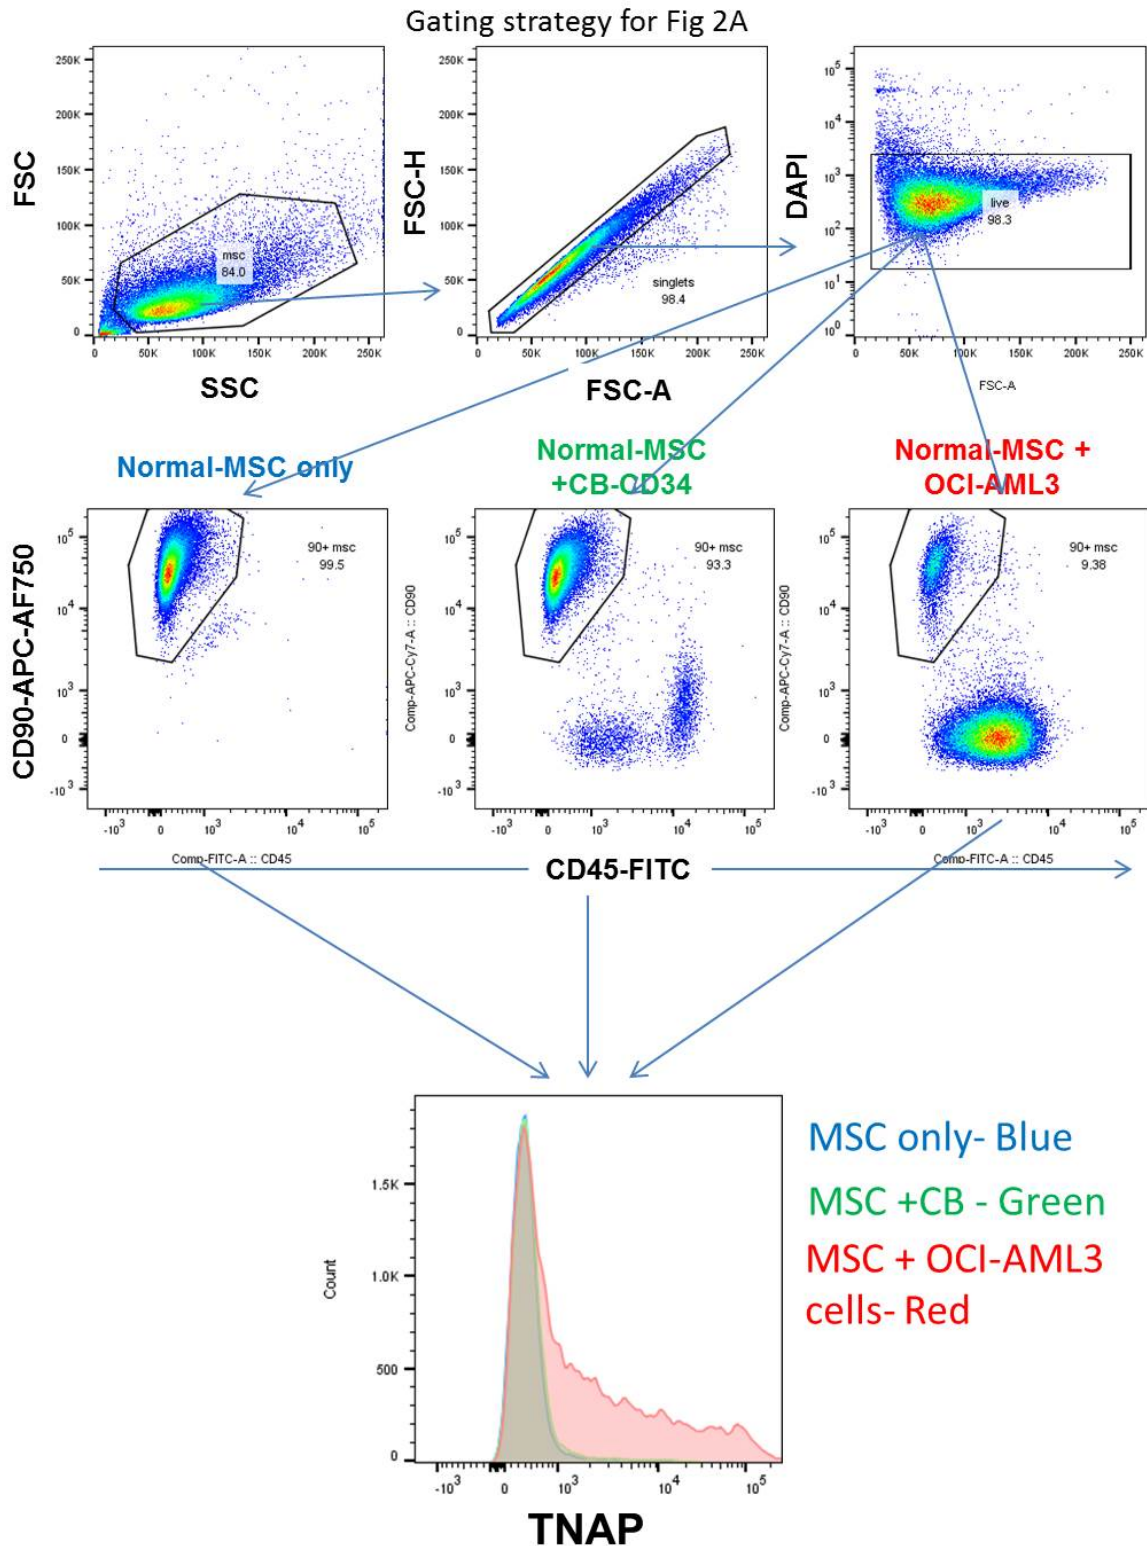

**Supplementary Figure 5.** Gating strategy to examine *TNAP* expression on Normal-MSCs with or without cord blood (CB) derived  $CD34^+$  cells or OCI-AML3 cells. N-MSCs were co-cultured

with OCI-AML3 cells or with CB-CD34<sup>+</sup> cells or Normal-MSCs cultured alone for 3 or 5 or 7 days. After incubation, the cells were trypsinized and incubated with anti-human CD90 conjugated with APC-Alexa flour-750 and anti-human CD45 conjugated with FITC and anti-human TNAP conjugated with-PE. Cells were initially gated on dual scatter dot plot and live cells were gated based on DAPI negative staining on LSR-II flow cytometer. The MSCs were gated as per their phenotype CD90<sup>+</sup>CD45<sup>-</sup>. TNAP expression on MSCs cultured with or without CB-CD34<sup>+</sup> or OCI-AML3 cells was analyzed by overlaying histograms generated by FlowJo software.

**A)**

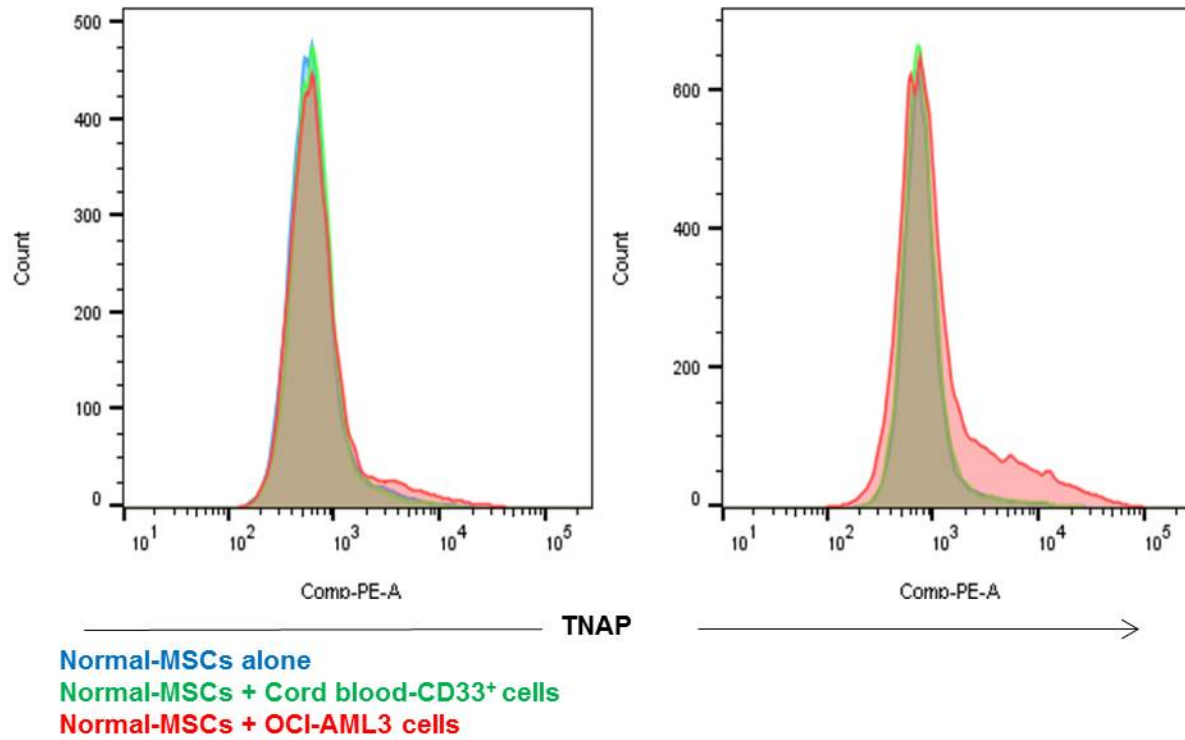

**B)**

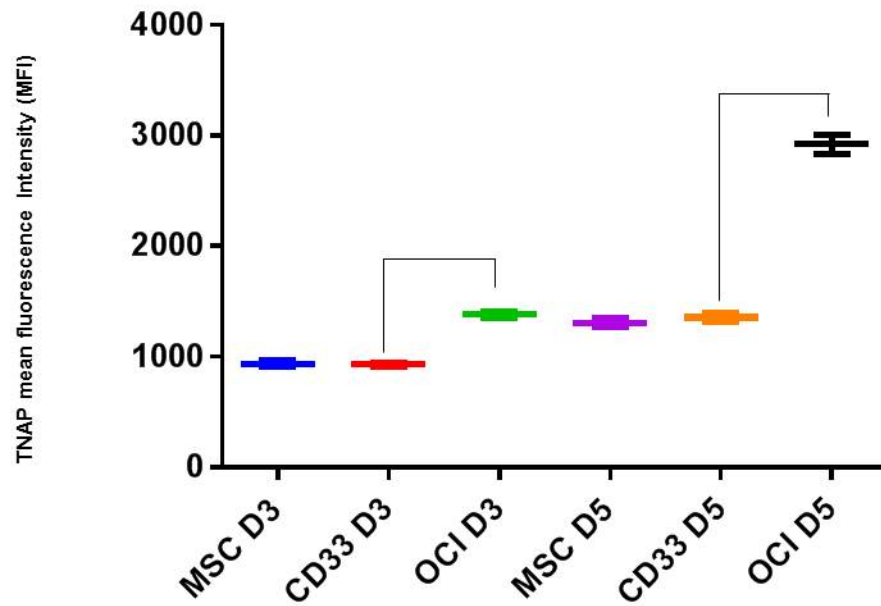

**Supplementary Figure 6.** *AML cells induce osteogenic differentiation in N-MSCs.* (a) N-MSCs were co-cultured with OCI-AML3 cells (red) or with cord blood derived CD33<sup>+</sup> cells (green) or Normal-MSCs cultured alone (blue) for 3 or 5 days, and TNAP expression was analyzed by LSR-II flow cytometer (n=3). Data were analyzed and histograms generated by FlowJo software. (b) MFI of TNAP expression were quantified in N-MSCs monocultured or co-cultured with CB-CD33<sup>+</sup> or OCI-AML3 cells for 3 or 5 days.

**A)**

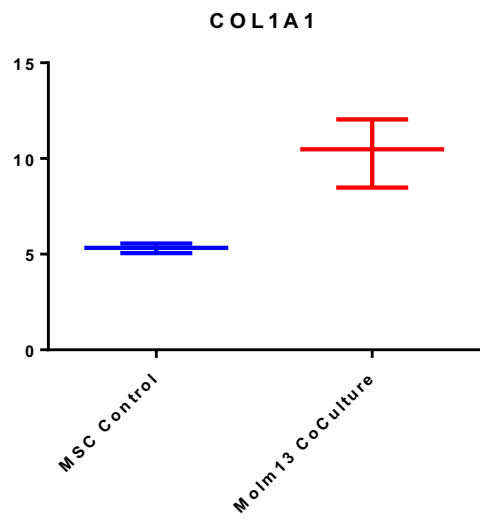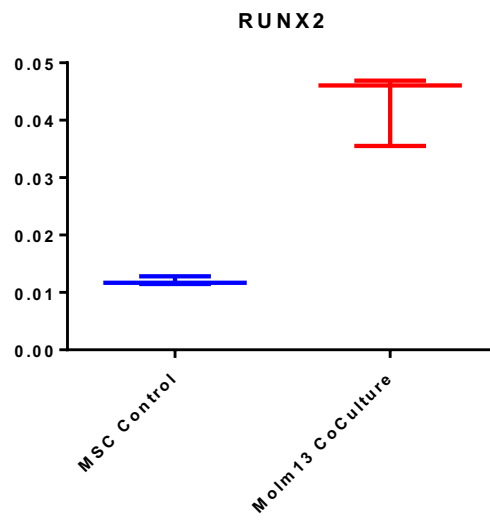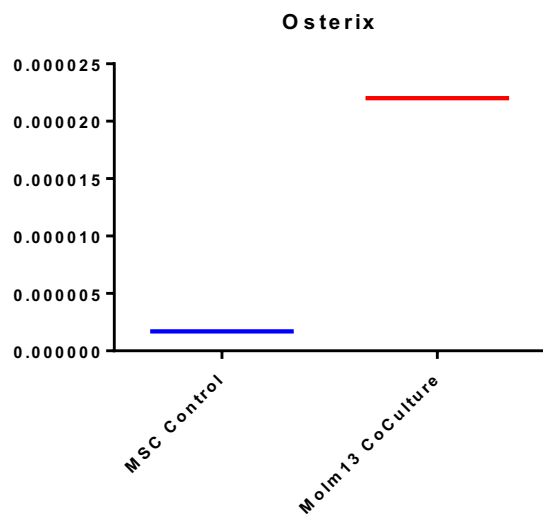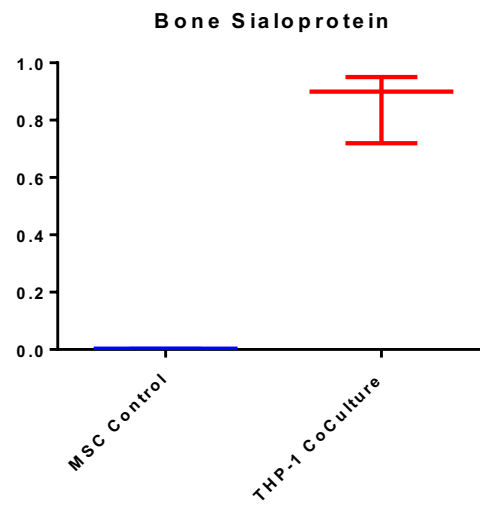

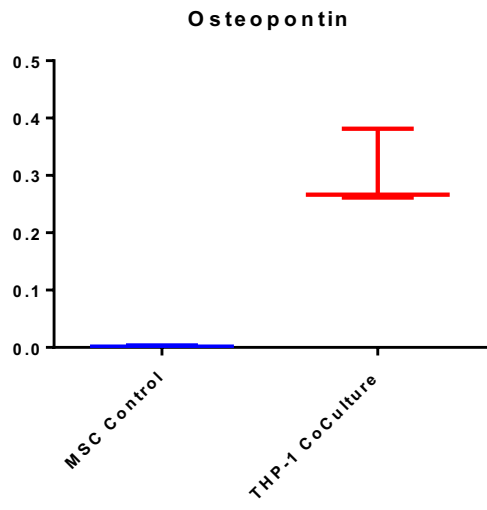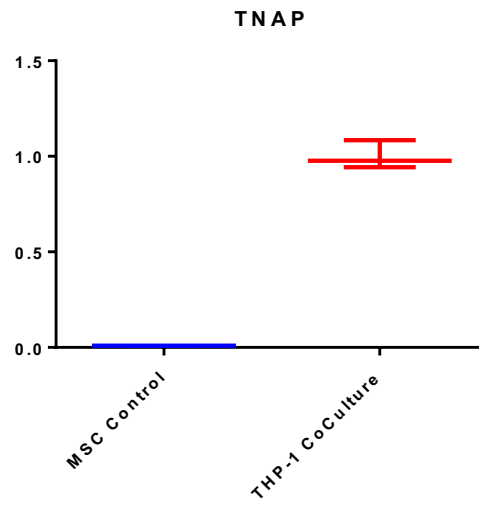

**B)**

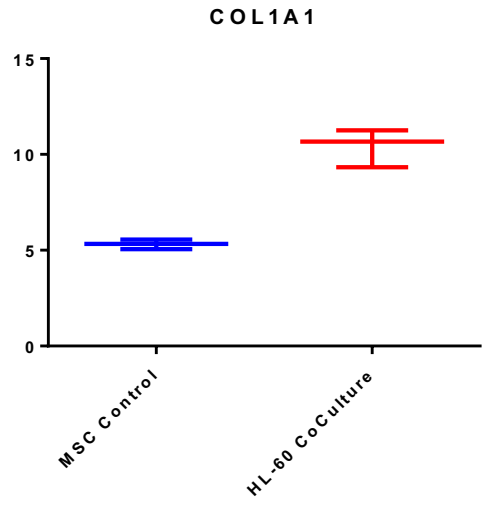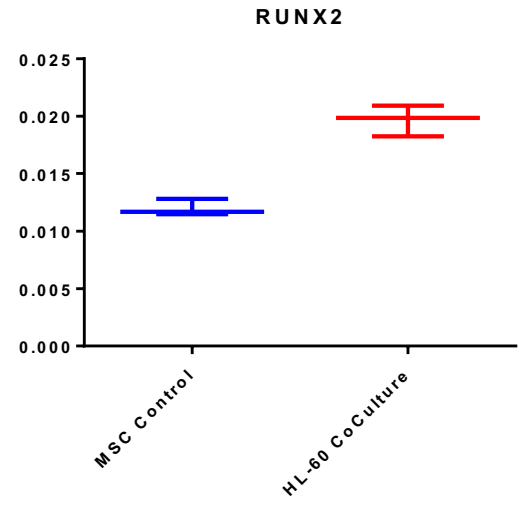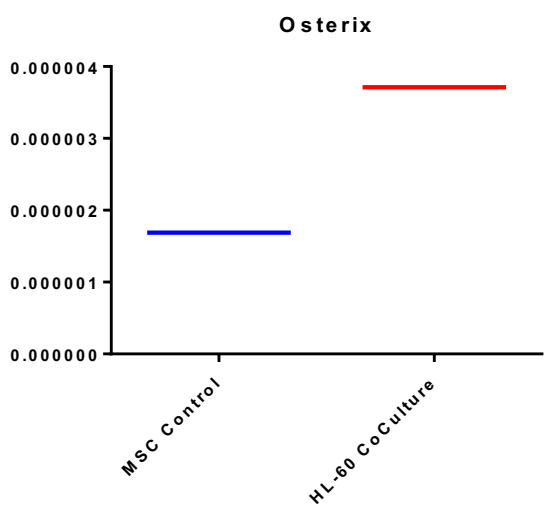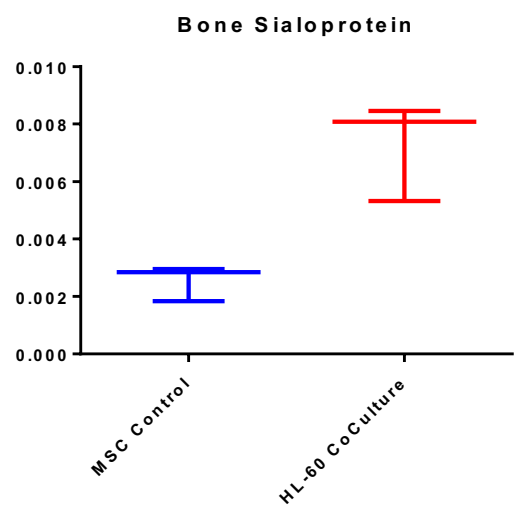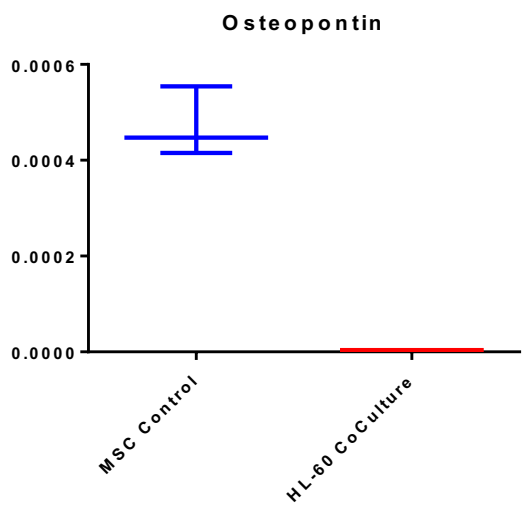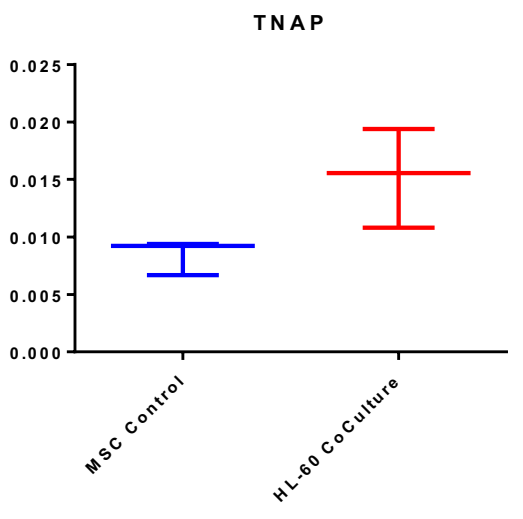

**Supplementary figure 7:** *AML cells induce osteogenic differentiation in N-MSCs.* AML cell lines including Molm13 (A) and HL60 (B) cells were co-cultured with or without N-MSCs for 5 days and MSCs were FACS sorted as described before. mRNA expression of osteogenic differentiation associated genes including *coll1a1*, *RUNX2*, *osterix*, *bone sialoprotein*, *osteopontin* and *TNAP* in MSCs was measured by qRT-PCR. Relative gene expression to beta-actin is represented in bar graph.

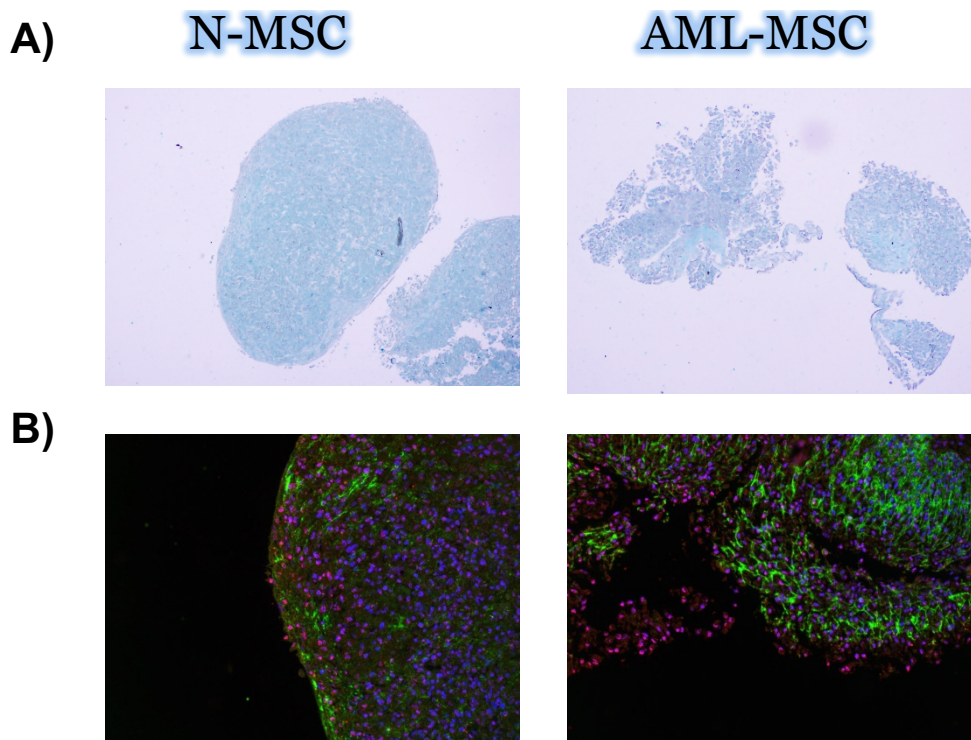

**Supplementary Figure 8.** *Chondrogenic differentiation is moderately affected in AML-MSCs.* After culture in chondrogenic differentiation medium for 28 days, N-MSCs and ALM-MSCs were subjected to (a) Alcian Blue staining or (b) immunostaining for collagen type-1 (green) or type-2 (red). The Opal multiplex staining method was used to develop the signal from antibody staining. Images were taken by using the Vectra multispectral imaging system.



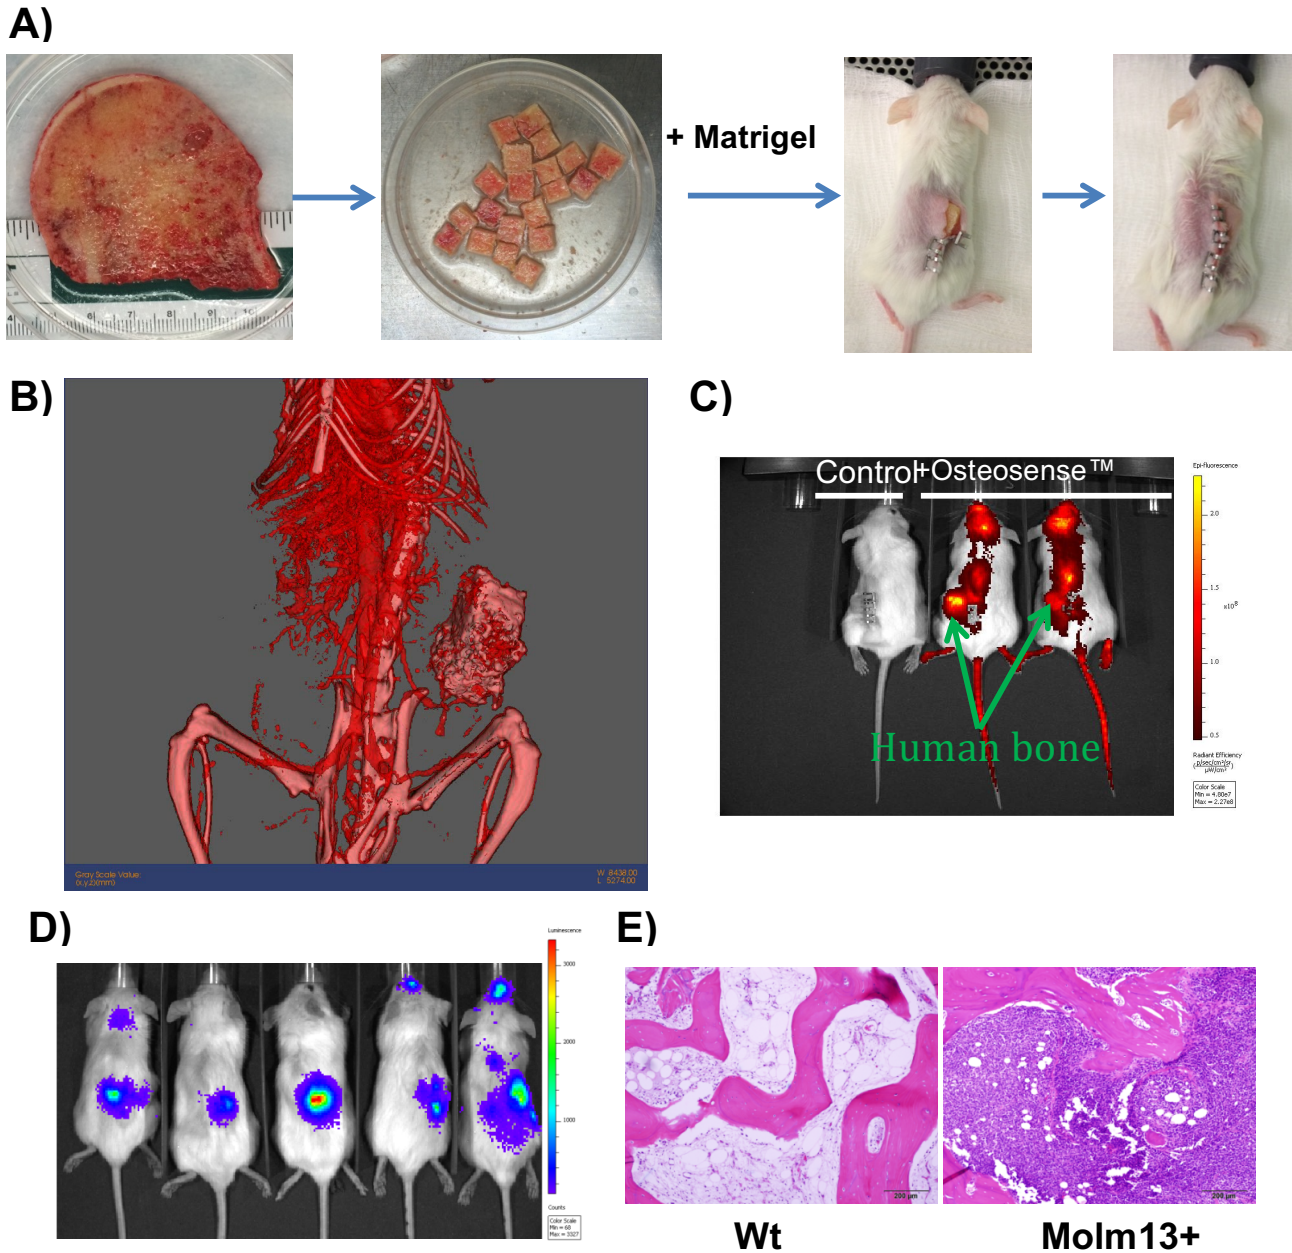

**Supplementary Figure 9.** *AML-induced osteogenic differentiation of MSCs is validated in the HBMI mouse model.* (a) Fragments of human femur were implanted into the flanks of NSG mice to model human bone marrow conditions. Fresh human femurs were cut into 1×1-cm pieces and mixed with matrigel. Two 1-cm incisions were made in the right flank of each mouse using a sterile sharp scalpel, and a human bone fragment was implanted subcutaneously into each

mouse. Surgical clips were used to fix the bone temporarily. (b) This video clip shows a CT scan of a representative HBMI mouse 4 weeks after bone fragment implantation. AuroVist 15 nm was used as the contrast agent to visualize the mouse vasculature. (c) HBMI mice and controls were injected intravenously with OsteoSense 750EX dye (100  $\mu$ L/mouse). The IVIS imaging system was used to visualize active bone generation, and the data were analyzed by Living Image software. (d) HBMI mice were injected intravenously with Molm13 AML cells ( $1 \times 10^6$ ) expressing firefly luciferase 4 weeks after bone fragment implantation (n=5). IVIS bioluminescence imaging was performed on day 10 after Molm13 cell transplantation. (e) H&E staining of representative human bone samples from HBMI mice transplanted with (right) or not transplanted with (left) Molm13 cells. Scale bar, 200  $\mu$ m.

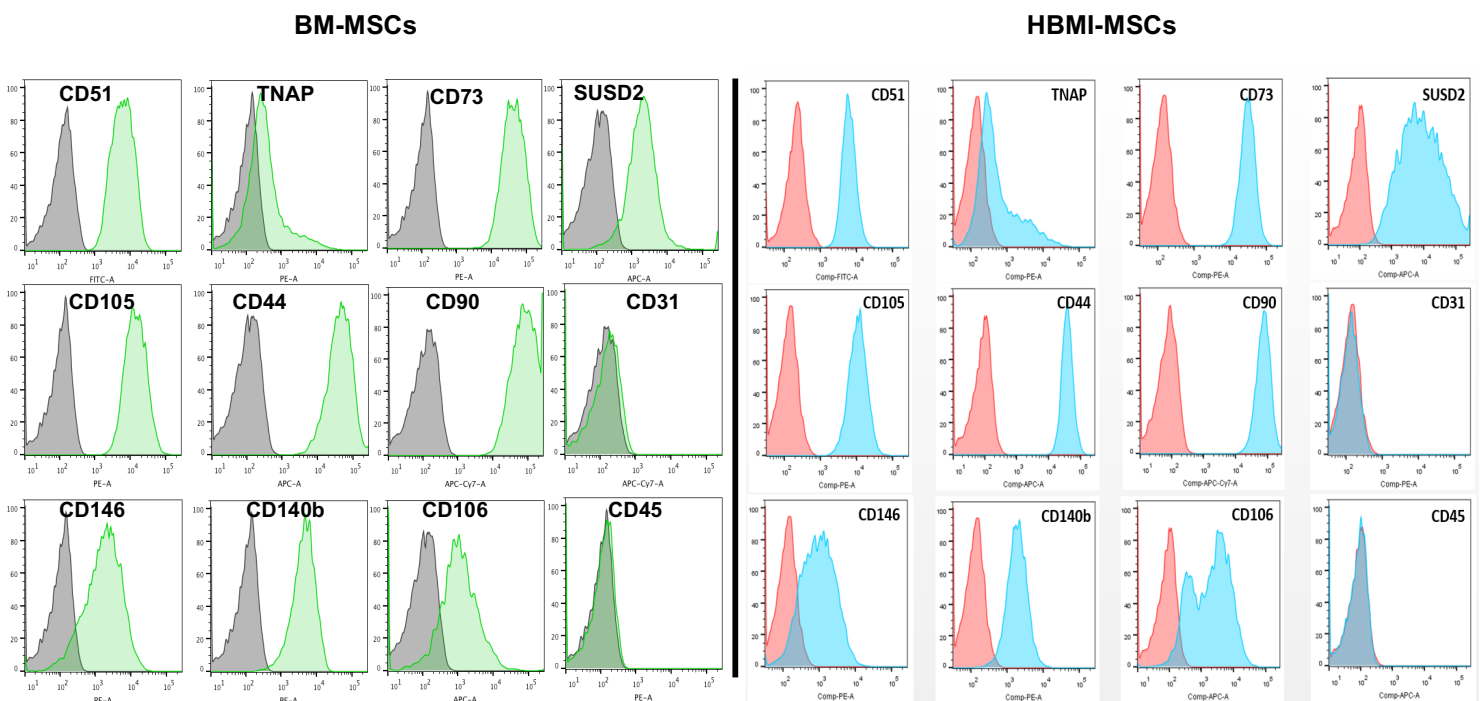

**Supplementary Figure 10.** HBMI-derived MSCs are phenotypically and functionally similar to human BM-derived MSCs. MSCs were extracted from HBMI mice and subjected to FACS using human CD140b and human CD90 antibodies. BM-MSCs (left) and HBMI-derived human MSCs

(right) were subjected to immunophenotyping analysis for selected MSC surface markers by flow cytometry. Data were analyzed by FlowJo software.

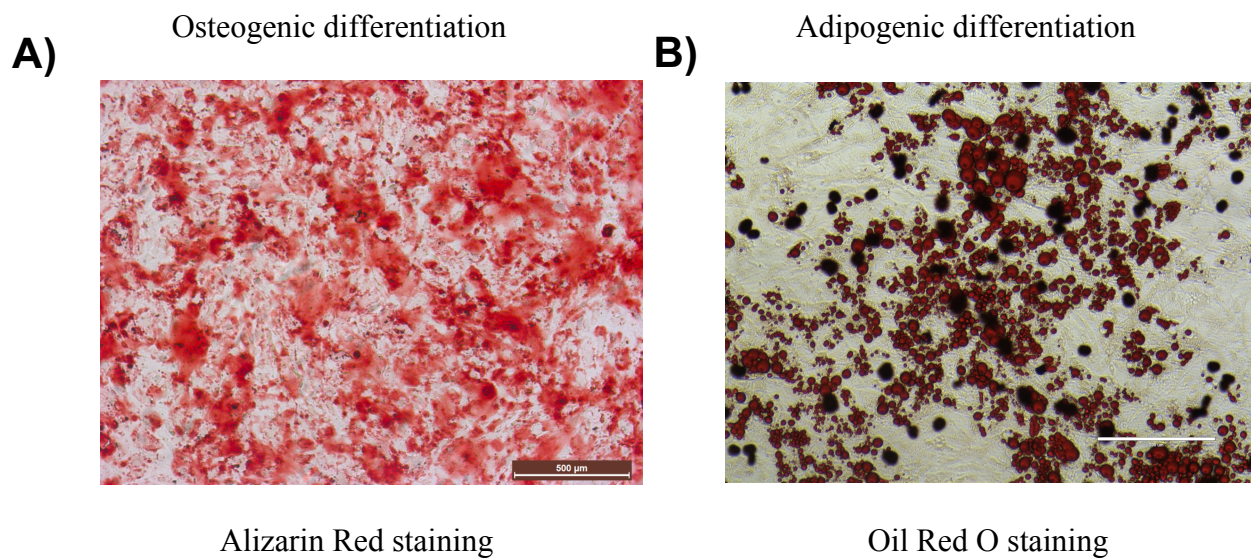

**Supplementary Figure 11.** *HBMI-derived MSCs differentiate into osteogenic and adipogenic lineage.* MSCs were extracted from HBMI derived from mice and subjected to osteogenic and adipogenic differentiation. (a) Alizarine Red S staining representing mineral deposition and mature osteoblast formation. (b) Oil Red O staining represents mature oil droplet formation and adipocyte differentiation of HBMI-derived MSCs.



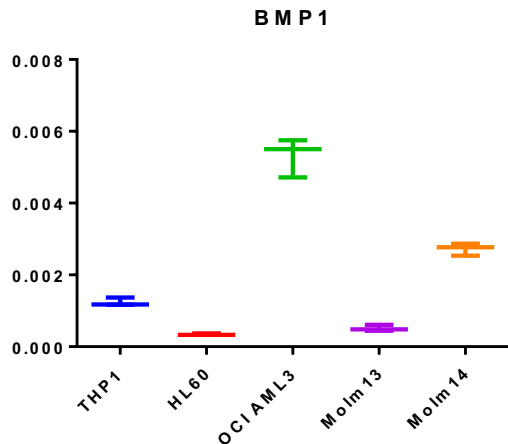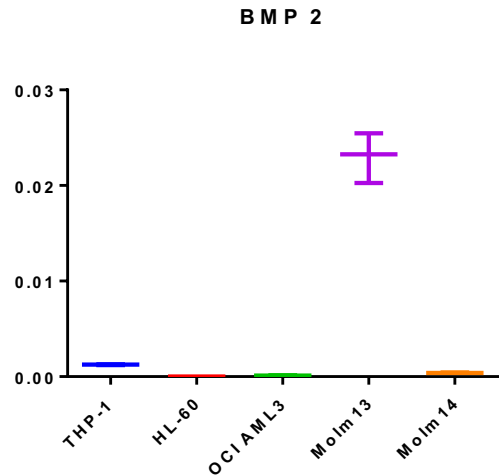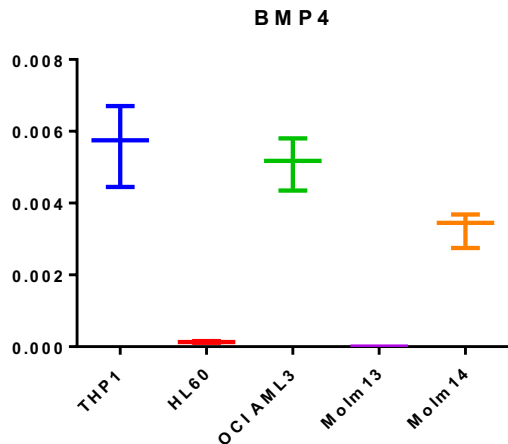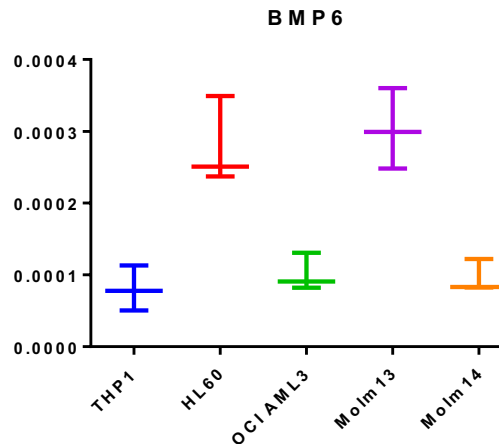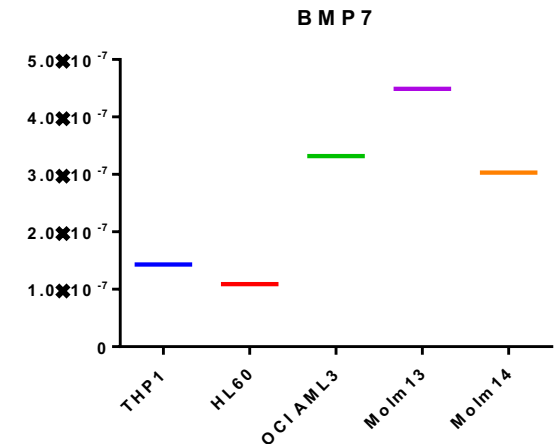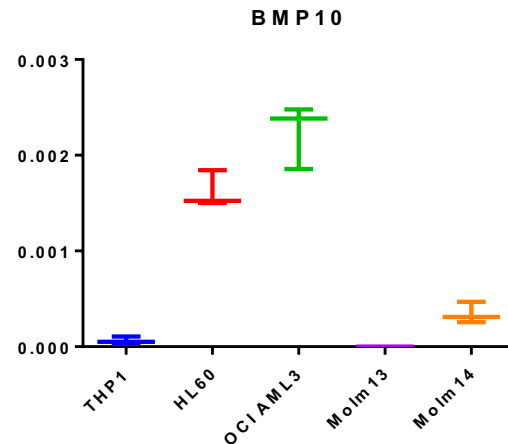

**Supplementary Figure 12:** BMP ligands expression in AML cell lines. mRNA from AML cell lines including Tnp1, HL60, OCI-AML3, molm13 and molm14 was isolated expression of BMP1, 2, 4, 6, 7, and 10 was analyzed by qRT-PCR. Relative expression of BMPs to beta-actin in AML cell lines is represented in bar graph.
